# Supplementary material for: Fossilized spermatozoa preserved in a 50-Myr-old annelid cocoon from Antarctica
Source: PubMed Central journal article supplement (PMC4528455; doi:10.1098/rsbl.2015.0431), 2015-07
Supplement: rsbl20150431supp1.pdf [file rsbl20150431supp1.pdf]

Electronic supplementary material to

Fossilized spermatozoa preserved in a 50-my-old annelid  
cocoon from Antarctica

Benjamin Bomfleur<sup>1\*</sup>, Thomas Mörs<sup>1</sup>, Marco Ferraguti<sup>2</sup>, Marcelo A. Reguero<sup>3,4,5</sup>, and  
Stephen McLoughlin<sup>1</sup>

<sup>1</sup>Department of Palaeobiology, Swedish Museum of Natural History, Stockholm, Sweden;

<sup>2</sup>Dipartimento di Bioscienze, Università degli Studi di Milano, Milano, Italy; <sup>3</sup>División Paleontología de Vertebrados, Museo de La Plata, La Plata, Argentina; <sup>4</sup>CONICET; <sup>5</sup>Instituto Antártico Argentino, Balcarce 290, (C1064AAF), Buenos Aires, Argentina

*\*author for correspondence; email: benjamin.bomfleur@nrm.se*

## Geological and palaeontological background information

The La Meseta Formation (Seymour Island Group; Seymour/Marambio Island, Weddell Sea, Antarctic Peninsula; figure S1) consists of shallow-marine to estuarine, poorly consolidated siliciclastic deposits that represent the filling of an incised-valley system [26,27]. It contains rich and very diverse fossil assemblages dominated by marine invertebrates and vertebrates (see e.g. [12,26,27]). The fossil annelid cocoons were collected from localities IAA 1/90 (also known as the ‘Ungulate site’; 64°14'04.67"S; 56°39'56.38"W) and IAA 2/95 (known as the ‘Marsupial site’; 64°13'58"S; 56°39'06"W) from the northern part of the island; both sites expose lenses of a distinctive conglomerate with abundant shells of naticid gastropods (‘*Natica* horizon’), and occur at the same stratigraphic level in the central portion of the Cucullaea I Allomember of the La Meseta Formation (figure S1). In addition to abundant marine fossils, the ‘*Natica* horizon’ in particular has yielded a broad range of fossils of non-marine organisms, including remains of terrestrial mammals and plants [26,27]. Of special interest is the high abundance of dispersed seeds of aquatic angiosperms, such as *Nuphar* (‘water lilies’) and *Nelumbo* (‘lotus’) [28], which documents the existence of permanent freshwater bodies as suitable potential habitats for the cocoon-producing clitellates described here. Overall, palaeoclimatic reconstructions indicate temperate and generally ice-free conditions for the Antarctic Peninsula Region during the early Eocene [29].

Although the precise age of the La Meseta Formation is still under debate, a recent chronostratigraphic synthesis [30] placed deposition of the ‘*Natica* horizon’ at ~50 Ma (Ypresian, early Eocene), because it is bracketed by beds that have been dated via Strontium data to 49.4 Ma and 50.8 Ma, respectively [11,26]. This age assignment agrees very well with biostratigraphic assessments based on correlation of mammal assemblages [31].

## Methods

Because the host deposit is only poorly consolidated, sediment samples could be dry-sieved immediately on site over 2 cm mesh screens in order to remove larger pebbles, shells, and shell fragments. The collected residues were then dry-sieved again in the laboratory over >4.0, >2.0, and >0.5 mm mesh screens. Cocoon fossils were picked from the residues of the 2.0–4.0-mm-size fraction under a stereomicroscope using an entomology forceps.

Selected specimens were mounted on stubs, sputter-coated with gold, and examined using a Hitachi S-4300 field emission scanning electron microscope at the Swedish Museum of Natural History. In addition, two cocoon fragments were analysed using Synchrotron-radiation-based X-ray tomographic microscopy (SRXTM) at the Tomography Station of the Materials Science Beamline (TOMCAT) at the Swiss Light Source, Paul Scherrer Institute (Villigen, Switzerland) [32,33]. The specimens were analysed using a beam energy of 10 keV and a 20× objective, resulting in voxel dimensions of 0.325 µm. Projections were acquired over 1501 stepwise increments through a rotation of 180°, and processed and arranged following the methods detailed in [34]. Tomographic reconstructions were made using Avizo®. All material is housed in the palaeobiology collections of the Swedish Museum of Natural History (Stockholm, Sweden), under accession numbers NRM-S089727–089730.

## Additional references

- 26 Reguero M, Goin F, Hospitaleche CA, Dutra T, Marensi S. 2012 Late Cretaceous/Paleogene West Antarctica terrestrial biota and its intercontinental affinities. *Spring. Briefs Earth Syst. Sci.*, 1–120. (doi:10.1007/978-94-007-5491-1\_1)
- 27 Marensi SA, Santillana SN, Rinaldi CA. 1998 Stratigraphy of the La Meseta Formation (Eocene), Marambio (Seymour) Island, Antarctica. *Asoc. Paleont. Argent. Publ. Espec.* **5**, 137–146.
- 28 Iglesias A, Reguero M. 2012 Semillas de angiospermas acuáticas del Eoceno Temprano de Isla Seymour (=Marambio), Península Antártica. In *Abriendo Ventanas al Pasado: Libro de Resúmenes III Simposio-Palaeontología en Chile* (ed M Leppe, JV Aravena, R Villa-Martínez), pp. 72–75. Punta Arenas, Chile.
- 29 Francis JE et al. 2009 From Greenhouse to Icehouse – the Eocene/Oligocene in Antarctica. In *Antarctic Climate Evolution* (ed. F Florindo, M Siebert), *Developm Earth Environm Sci* **8**, 309–368.
- 30 Montes M, Nozal F, Santillana SN, Marensi SA, Olivero E 2013. Mapa Geológico de la Isla Marambio (Seymour). Escala 1:20.000. Primera Edición. Serie Cartográfica Geocientífica Antártica IGME-IAA. Madrid: Instituto Geológico y Minero de España; Buenos Aires: Instituto Antártico Argentino.
- 31 Gelfo JN, Reguero MA, López GM, Carlini AA, Ciancio MR, Chornogubsky L, Bond M, Goin FJ, Tejedor M 2009. Eocene mammals and continental strata from Patagonia and Antarctic Peninsula. In *Papers on Geology, Vertebrate Paleontology, and Biostratigraphy in Honor of Michael O. Woodburne* (ed. LB Albright III), *Mus. North Arizona Bull.* **64**, 567–592.
- 32 Stampanoni M, Groso A, Isenegger A, Mikuljan G, Chen Q, Bertrand A, Henein S, Betemps R, Frommherz U, Bohler P, Meister D, Lange M, Abela R. 2006 Trends in

- synchrotron-based tomographic imaging: the SLS experience. In *Developments in X-Ray Tomography V* (ed U Bonse), 63180M-14. (doi: 10.1117/12.679497)
- 33 Friis EM, Marone F, Pedersen KR, Crane PR, Stampanoni M. 2014 Three-dimensional visualization of fossil flowers, fruits, seeds, and other plant remains using Synchrotron radiation X-ray tomographic microscopy (SRXTM): new insights into Cretaceous plant diversity. *J. Paleont.* **88**, 684–701.
- 34 Marone F, Stampanoni M. 2012 Regridding reconstruction algorithm for real-time tomographic imaging. *J. Synchrotron Radiat.* **19**, 1029–1037. (doi:10.1107/S0909049512032864 ).

**Figure S1**

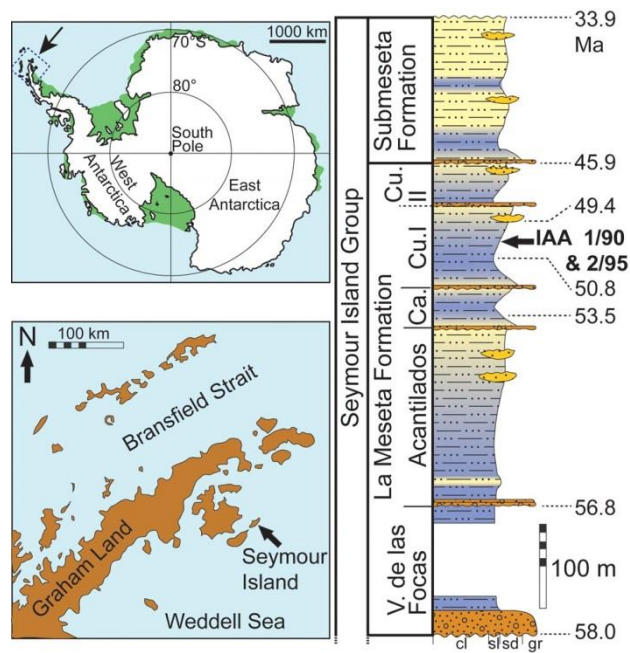

**Figure S1.** Locality details for the studied fossils: (a) map of Antarctica showing the position of the Antarctic Peninsula; (b) map of the Antarctic Peninsula showing Seymour Island; (c) composite measured section through the La Meseta Formation showing the stratigraphic position of the sampled bed.

**Figure S2**

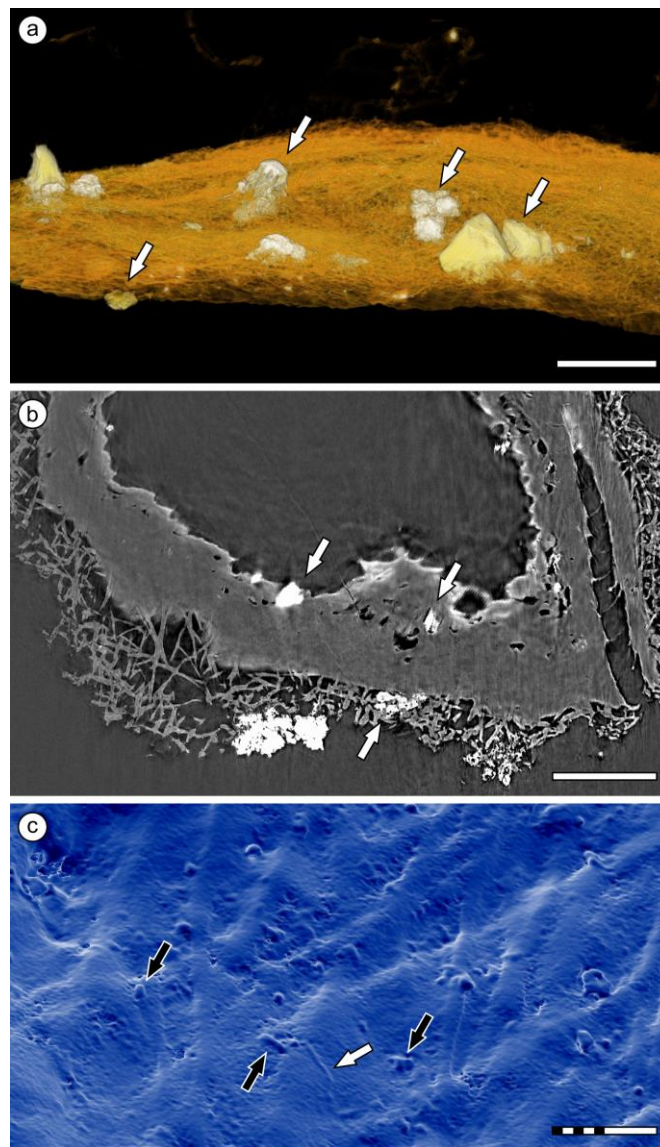

**Figure S2.** SRXTM reconstructions of an annelid-cocoon wall fragment from the Eocene La Meseta Formation, Seymour/Marambio Island, Antarctica, showing variously sized cocoon-wall inclusions. (a) Transparent voltex rendering showing adhering and embedded mineral particles (arrows). (b) Orthoslice in oblique tangential section through the clitellate cocoon showing inner solid and outer spongy layer with embedded, highly reflecting mineral particles (arrows). (c) Detail of surface rendering of the inner cocoon-wall surface showing embedded structures consistent in overall shape and dimension with an interpretation as included rod-shaped bacilli (black arrows) and a possible spermatozoan fragment (white arrow). Scale bars: (a,b) = 100  $\mu\text{m}$ ; (c) = 10  $\mu\text{m}$ .
